# Supplementary material for: Identifying protein interaction subnetworks by a bagging Markov random field-based method
Source: PubMed Central journal article supplement — Nucleic Acids Res. 2012 Nov 17;41(2):e42. doi: 10.1093/nar/gks951 (PMC3553975; doi:10.1093/nar/gks951), 2012-11-17
Supplement: supp_gks951_nar-01217-met-n-2012-File013.pdf [file supp_gks951_nar-01217-met-n-2012-File013.pdf]

| <b>Entrez Gene ID</b> | <b>Symbol</b> | <b>Gene Name</b>                                                            | <b>Fold Change (log2(Recurrence/N onRecurrence))</b> |
|-----------------------|---------------|-----------------------------------------------------------------------------|------------------------------------------------------|
| 332                   | BIRC5         | baculoviral IAP repeat-containing 5                                         | 0.525534741                                          |
| 604                   | BCL6          | B-cell CLL/lymphoma 6                                                       | -0.324826297                                         |
| 672                   | BRCA1         | breast cancer 1, early onset                                                | 0.168514568                                          |
| 861                   | RUNX1         | runt-related transcription factor 1                                         | -0.425389522                                         |
| 891                   | CCNB1         | cyclin B1                                                                   | 0.553332943                                          |
| 894                   | CCND2         | cyclin D2                                                                   | -0.279525094                                         |
| 983                   | CDC2          | cell division cycle 2, G1 to S and G2 to M                                  | 0.533405133                                          |
| 995                   | CDC25C        | cell division cycle 25 homolog C (S. pombe)                                 | 0.237402042                                          |
| 1019                  | CDK4          | cyclin-dependent kinase 4                                                   | 0.19392358                                           |
| 1386                  | ATF2          | activating transcription factor 2                                           | 0.187614742                                          |
| 1894                  | ECT2          | epithelial cell transforming sequence 2 oncogene                            | 0.490921486                                          |
| 2002                  | ELK1          | ELK1, member of ETS oncogene family                                         | -0.224147538                                         |
| 2022                  | ENG           | endoglin                                                                    | -0.287278403                                         |
| 2353                  | FOS           | v-fos FBJ murine osteosarcoma viral oncogene homolog                        | -0.884614147                                         |
| 2885                  | GRB2          | growth factor receptor-bound protein 2                                      | 0.302956377                                          |
| 2887                  | GRB10         | growth factor receptor-bound protein 10                                     | -0.419307606                                         |
| 2934                  | GSN           | gelsolin (amyloidosis, Finnish type)                                        | -0.414611209                                         |
| 3066                  | HDAC2         | histone deacetylase 2                                                       | 0.336448302                                          |
| 3725                  | JUN           | jun oncogene                                                                | -0.25073622                                          |
| 3726                  | JUNB          | jun B proto-oncogene                                                        | -0.381292422                                         |
| 4242                  | MFNG          | MFNG O-fucosylpeptide 3-beta-N-acetylglucosaminyltransferase                | -0.220544272                                         |
| 4582                  | MUC1          | mucin 1, cell surface associated                                            | -0.540474233                                         |
| 4851                  | NOTCH1        | Notch homolog 1, translocation-associated (Drosophila)                      | -0.251020211                                         |
| 5296                  | PIK3R2        | phosphoinositide-3-kinase, regulatory subunit 2 (beta)                      | -0.170435853                                         |
| 5310                  | PKD1          | polycystic kidney disease 1 (autosomal dominant)                            | -0.265291721                                         |
| 5347                  | PLK1          | polo-like kinase 1 (Drosophila)                                             | 0.132883555                                          |
| 5371                  | PML           | promyelocytic leukemia; similar to promyelocytic leukemia protein isoform 1 | -0.190408636                                         |
| 5468                  | PPARG         | peroxisome proliferator-activated receptor gamma                            | -0.467009362                                         |
| 5594                  | MAPK1         | mitogen-activated protein kinase 1                                          | 0.310605668                                          |
| 5603                  | MAPK13        | mitogen-activated protein kinase 13                                         | 0.390618994                                          |
| 5685                  | PSMA4         | proteasome (prosome, macropain) subunit, alpha type, 4                      | 0.199878791                                          |
| 5713                  | PSMD7         | proteasome (prosome, macropain) 26S subunit, non-ATPase, 7                  | 0.333535736                                          |
| 5716                  | PSMD10        | proteasome (prosome, macropain) 26S subunit, non-ATPase, 10                 | 0.249477702                                          |
| 5984                  | RFC4          | replication factor C (activator 1) 4, 37kDa                                 | 0.303129653                                          |

|       |          |                                                                                                                  |              |
|-------|----------|------------------------------------------------------------------------------------------------------------------|--------------|
| 6777  | STAT5B   | signal transducer and activator of transcription 5B                                                              | -0.215670749 |
| 6790  | AURKA    | aurora kinase A; aurora kinase A pseudogene 1<br>similar to G/T mismatch-specific thymine DNA                    | 0.586894665  |
| 6996  | TDG      | glycosylase; thymine-DNA glycosylase                                                                             | 0.30849646   |
| 7040  | TGFB1    | transforming growth factor, beta 1                                                                               | -0.287566795 |
| 7048  | TGFBR2   | transforming growth factor, beta receptor II (70/80kDa)                                                          | -0.245458396 |
| 7431  | VIM      | vimentin                                                                                                         | -0.200376664 |
| 7535  | ZAP70    | zeta-chain (TCR) associated protein kinase 70kDa                                                                 | -0.199687398 |
| 8318  | CDC45L   | CDC45 cell division cycle 45-like ( <i>S. cerevisiae</i> )<br>mitogen-activated protein kinase-activated protein | 0.374948834  |
| 8550  | MAPKAPK5 | kinase 5                                                                                                         | 0.185703912  |
| 8805  | TRIM24   | tripartite motif-containing 24                                                                                   | 0.304387027  |
| 9133  | CCNB2    | cyclin B2                                                                                                        | 0.441986629  |
| 9612  | NCOR2    | nuclear receptor co-repressor 2                                                                                  | -0.115717718 |
| 10482 | NXF1     | nuclear RNA export factor 1                                                                                      | -0.240313133 |
| 10617 | STAMBP   | STAM binding protein                                                                                             | 0.306671217  |
| 10856 | RUVBL2   | RuvB-like 2 ( <i>E. coli</i> )                                                                                   | 0.25485086   |
| 11171 | STRAP    | serine/threonine kinase receptor associated protein                                                              | 0.273783403  |
| 22927 | HABP4    | hyaluronan binding protein 4                                                                                     | -0.221994708 |
| 23043 | TNIK     | TRAF2 and NCK interacting kinase                                                                                 | -0.426386363 |
| 23225 | NUP210   | nucleoporin 210kDa                                                                                               | -0.412124352 |
| 55165 | CEP55    | centrosomal protein 55kDa                                                                                        | 0.460341582  |
| 55568 | GALNT10  | UDP-N-acetyl-alpha-D-galactosamine:polypeptide N-acetylgalactosaminyltransferase 10 (GalNAc-T10)                 | -0.519407666 |
| 55759 | WDR12    | WD repeat domain 12                                                                                              | 0.227374836  |
| 55872 | PBK      | PDZ binding kinase                                                                                               | 0.545601185  |

---
