# Supplementary material for: Identifying protein interaction subnetworks by a bagging Markov random field-based method
Source: PubMed Central journal article supplement — Nucleic Acids Res. 2012 Nov 17;41(2):e42. doi: 10.1093/nar/gks951 (PMC3553975; doi:10.1093/nar/gks951), 2012-11-17
Supplement: supp_gks951_nar-01217-met-n-2012-File014.pdf [file supp_gks951_nar-01217-met-n-2012-File014.pdf]

| Entrez Gene ID | Symbol  | Gene Name                                                                                                         | Fold Change (log2(Recurrence/N onRecurrence)) |
|----------------|---------|-------------------------------------------------------------------------------------------------------------------|-----------------------------------------------|
| 324            | APC     | adenomatous polyposis coli                                                                                        | 0.494545655                                   |
| 580            | BARD1   | BRCA1 associated RING domain 1                                                                                    | 0.669903653                                   |
| 660            | BMX     | BMX non-receptor tyrosine kinase                                                                                  | -0.238669308                                  |
| 815            | CAMK2A  | calcium/calmodulin-dependent protein kinase II alpha                                                              | -0.559476431                                  |
| 836            | CASP3   | caspase 3, apoptosis-related cysteine peptidase                                                                   | 0.391312192                                   |
| 867            | CBL     | Cas-Br-M (murine) ecotropic retroviral transforming sequence                                                      | -0.163432692                                  |
| 958            | CD40    | CD40 molecule, TNF receptor superfamily member 5                                                                  | -0.553882674                                  |
| 1103           | CHAT    | choline acetyltransferase                                                                                         | -0.658177837                                  |
| 1432           | MAPK14  | mitogen-activated protein kinase 14                                                                               | 0.414557136                                   |
| 1477           | CSTF1   | cleavage stimulation factor, 3' pre-RNA, subunit 1, 50kDa                                                         | 0.566485265                                   |
| 1965           | EIF2S1  | eukaryotic translation initiation factor 2, subunit 1 alpha, 35kDa                                                | 0.477091261                                   |
| 2002           | ELK1    | ELK1, member of ETS oncogene family                                                                               | -0.337182511                                  |
| 2100           | ESR2    | estrogen receptor 2 (ER beta)                                                                                     | -0.316795144                                  |
| 2107           | ETF1    | eukaryotic translation termination factor 1                                                                       | 0.481736773                                   |
| 2113           | ETS1    | v-ets erythroblastosis virus E26 oncogene homolog 1 (avian)                                                       | -0.202972349                                  |
| 2185           | PTK2B   | PTK2B protein tyrosine kinase 2 beta                                                                              | -0.309628449                                  |
| 2623           | GATA1   | GATA binding protein 1 (globin transcription factor 1)                                                            | -0.354062705                                  |
| 2764           | GMFB    | glia maturation factor, beta                                                                                      | 0.622974522                                   |
| 2885           | GRB2    | growth factor receptor-bound protein 2                                                                            | 0.334706637                                   |
| 3066           | HDAC2   | histone deacetylase 2                                                                                             | 0.517571615                                   |
| 3172           | HNF4A   | hepatocyte nuclear factor 4, alpha                                                                                | -0.507728369                                  |
| 3309           | HSPA5   | hypothetical gene supported by AF216292; NM_005347; heat shock 70kDa protein 5 (glucose-regulated protein, 78kDa) | 0.43522888                                    |
| 3737           | KCNA2   | potassium voltage-gated channel, shaker-related subfamily,                                                        | -0.275481283                                  |
| 4141           | MARS    | methionyl-tRNA synthetase                                                                                         | 0.544162011                                   |
| 4261           | CIITA   | class II, major histocompatibility complex, transactivator                                                        | -0.316673373                                  |
| 4287           | ATXN3   | ataxin 3                                                                                                          | -0.625614449                                  |
| 5079           | PAX5    | paired box 5                                                                                                      | -0.334259408                                  |
| 5296           | PIK3R2  | phosphoinositide-3-kinase, regulatory subunit 2 (beta)                                                            | -0.314893224                                  |
| 5465           | PPARA   | peroxisome proliferator-activated receptor alpha                                                                  | -0.262570187                                  |
| 5468           | PPARG   | peroxisome proliferator-activated receptor gamma                                                                  | -0.37563578                                   |
| 5469           | MED1    | mediator complex subunit 1                                                                                        | 0.434624765                                   |
| 5515           | PPP2CA  | protein phosphatase 2 (formerly 2A), catalytic subunit, alpha                                                     | 0.473272859                                   |
| 5578           | PRKCA   | protein kinase C, alpha                                                                                           | -0.266285584                                  |
| 5581           | PRKCE   | protein kinase C, epsilon                                                                                         | -0.215710925                                  |
| 5594           | MAPK1   | mitogen-activated protein kinase 1                                                                                | 0.430039695                                   |
| 5599           | MAPK8   | mitogen-activated protein kinase 8                                                                                | -0.289449155                                  |
| 5888           | RAD51   | RAD51 homolog (RecA homolog, E. coli) (S. cerevisiae)                                                             | -0.296776052                                  |
| 6198           | RPS6KB1 | ribosomal protein S6 kinase, 70kDa, polypeptide 1                                                                 | 0.635406401                                   |
| 6258           | RXRG    | retinoid X receptor, gamma                                                                                        | -0.358083994                                  |
| 6303           | SAT1    | spermidine/spermine N1-acetyltransferase 1                                                                        | 0.507060898                                   |
| 6714           | SRC     | v-src sarcoma (Schmidt-Ruppin A-2) viral oncogene homolog                                                         | -0.224843024                                  |
| 6722           | SRF     | serum response factor (c-fos serum response element-binding                                                       | -0.30968953                                   |

|        |          |                                                                                                   |              |
|--------|----------|---------------------------------------------------------------------------------------------------|--------------|
| 6731   | SRP72    | signal recognition particle 72kDa                                                                 | 0.673963217  |
| 6850   | SYK      | spleen tyrosine kinase                                                                            | 0.308069919  |
| 7067   | THRA     | thyroid hormone receptor, alpha (erythroblastic leukemia viral (v-erb-a) oncogene homolog, avian) | -0.53426729  |
| 7080   | NKX2-1   | NK2 homeobox 1                                                                                    | -0.405983748 |
| 7353   | UFD1L    | ubiquitin fusion degradation 1 like (yeast)                                                       | 0.83766419   |
| 7415   | VCP      | valosin-containing protein                                                                        | 0.427159341  |
| 7535   | ZAP70    | zeta-chain (TCR) associated protein kinase 70kDa                                                  | -0.292570889 |
| 8648   | NCOA1    | nuclear receptor coactivator 1                                                                    | 0.355485315  |
| 8805   | TRIM24   | tripartite motif-containing 24                                                                    | 0.479763339  |
| 9001   | HAP1     | huntingtin-associated protein 1                                                                   | -0.228286268 |
| 9276   | COPB2    | coatamer protein complex, subunit beta 2 (beta prime)                                             | 0.561322315  |
| 9282   | MED14    | mediator complex subunit 14                                                                       | 0.417501791  |
| 9451   | EIF2AK3  | eukaryotic translation initiation factor 2-alpha kinase 3                                         | 0.562898053  |
| 9869   | SETDB1   | SET domain, bifurcated 1                                                                          | -0.352158306 |
| 10603  | SH2B2    | SH2B adaptor protein 2                                                                            | -0.603646751 |
| 22929  | SEPHS1   | selenophosphate synthetase 1; similar to selenophosphate                                          | 0.433867563  |
| 23309  | SIN3B    | SIN3 homolog B, transcription regulator (yeast)                                                   | -0.475896097 |
| 23542  | MAPK8IP2 | mitogen-activated protein kinase 8 interacting protein 2                                          | -0.482792504 |
| 23549  | DNPEP    | aspartyl aminopeptidase                                                                           | -0.620339325 |
| 25843  | MOBK13   | MOB1, Mps One Binder kinase activator-like 3 (yeast)                                              | 0.654869421  |
| 30836  | DNTTIP2  | deoxynucleotidyltransferase, terminal, interacting protein 2                                      | 0.414861015  |
| 54431  | DNAJC10  | DnaJ (Hsp40) homolog, subfamily C, member 10                                                      | 0.604693662  |
| 54900  | LAX1     | lymphocyte transmembrane adaptor 1                                                                | -0.505517453 |
| 79139  | DERL1    | Der1-like domain family, member 1                                                                 | 0.650758221  |
| 112950 | MED8     | mediator complex subunit 8                                                                        | 0.352451235  |

---
