# Supplementary material for: Identifying protein interaction subnetworks by a bagging Markov random field-based method
Source: PubMed Central journal article supplement — Nucleic Acids Res. 2012 Nov 17;41(2):e42. doi: 10.1093/nar/gks951 (PMC3553975; doi:10.1093/nar/gks951), 2012-11-17
Supplement: supp_gks951_nar-01217-met-n-2012-File015.pdf [file supp_gks951_nar-01217-met-n-2012-File015.pdf]

| Entrez Gene |          |                                                                                                                                                                                         | Fold Change<br>(log <sub>2</sub> (Recurrence/No<br>nRecurrence)) |
|-------------|----------|-----------------------------------------------------------------------------------------------------------------------------------------------------------------------------------------|------------------------------------------------------------------|
| ID          | Symbol   | Gene Name                                                                                                                                                                               |                                                                  |
| 142         | parp1    | poly (ADP-ribose) polymerase 1                                                                                                                                                          | 0.0553                                                           |
| 154         | ADRB2    | adrenergic, beta-2-, receptor, surface                                                                                                                                                  | -0.0641                                                          |
| 196         | ahr      | aryl hydrocarbon receptor                                                                                                                                                               | -0.0849                                                          |
| 367         | Ar       | androgen receptor                                                                                                                                                                       | -0.12                                                            |
| 550         | Aup1     | ancient ubiquitous protein 1                                                                                                                                                            | 0.0577                                                           |
| 596         | BCL2     | B-cell CLL/lymphoma 2                                                                                                                                                                   | -0.1569                                                          |
| 613         | bcr      | breakpoint cluster region                                                                                                                                                               | 0.0484                                                           |
| 857         | cav1     | caveolin 1, caveolae protein, 22kDa                                                                                                                                                     | -0.0778                                                          |
| 890         | CCNA2    | cyclin A2                                                                                                                                                                               | 0.0968                                                           |
| 983         | Cdk1     | cell division cycle 2, G1 to S and G2 to M                                                                                                                                              | 0.1121                                                           |
| 994         | Cdc25b   | cell division cycle 25 homolog B (S. pombe)                                                                                                                                             | 0.1462                                                           |
| 995         | CDC25C   | cell division cycle 25 homolog C (S. pombe)                                                                                                                                             | 0.0472                                                           |
| 1026        | CDKN1A   | cyclin-dependent kinase inhibitor 1A (p21, Cip1)                                                                                                                                        | 0.045                                                            |
| 1058        | CENPA    | centromere protein A                                                                                                                                                                    | 0.2031                                                           |
| 1059        | Cenpb    | centromere protein B, 80kDa                                                                                                                                                             | 0.0414                                                           |
| 1213        | CLTC     | clathrin, heavy chain (Hc)                                                                                                                                                              | 0.0806                                                           |
| 1457        | CSNK2A1P | casein kinase 2, alpha 1 polypeptide pseudogene; casein kinase 2, alpha 1 polypeptide<br>v-erb-b2 erythroblastic leukemia viral oncogene homolog 2, neuro/glioblastoma derived oncogene | 0.0325                                                           |
| 2064        | ErbB2    | homolog (avian)                                                                                                                                                                         | 0.0868                                                           |
| 2099        | Esr1     | estrogen receptor 1                                                                                                                                                                     | -0.2198                                                          |
| 2101        | esrra    | estrogen-related receptor alpha                                                                                                                                                         | 0.0488                                                           |
| 2157        | F8       | coagulation factor VIII, procoagulant component                                                                                                                                         | -0.033                                                           |
| 2247        | FGF2     | fibroblast growth factor 2 (basic)                                                                                                                                                      | -0.0569                                                          |
| 2353        | FOS      | v-fos FBJ murine osteosarcoma viral oncogene homolog                                                                                                                                    | -0.1296                                                          |
| 2810        | SFN      | stratifin                                                                                                                                                                               | 0.0724                                                           |
| 2870        | grk6     | G protein-coupled receptor kinase 6                                                                                                                                                     | 0.044                                                            |
| 2885        | GRB2     | growth factor receptor-bound protein 2                                                                                                                                                  | 0.0721                                                           |
| 2932        | GSK3B    | glycogen synthase kinase 3 beta                                                                                                                                                         | 0.0395                                                           |
| 3309        | HSPA5    | hypothetical gene supported by AF216292; NM_005347; heat shock 70kDa protein 5 (glucose-regulated protein, 78kDa)                                                                       | 0.0409                                                           |
| 3667        | IRS1     | insulin receptor substrate 1                                                                                                                                                            | -0.0863                                                          |
| 3678        | ITGA5    | integrin, alpha 5 (fibronectin receptor, alpha polypeptide)                                                                                                                             | 0.0537                                                           |
| 3925        | STMN1    | stathmin 1                                                                                                                                                                              | 0.1115                                                           |
| 4176        | MCM7     | minichromosome maintenance complex component 7<br>v-myb myeloblastosis viral oncogene homolog (avian)-like 2                                                                            | 0.0915                                                           |
| 4605        | MYBL2    |                                                                                                                                                                                         | 0.1016                                                           |
| 4771        | Nf2      | neurofibromin 2 (merlin)                                                                                                                                                                | 0.0542                                                           |

|      |          |                                                                                                                                                                                                      |         |
|------|----------|------------------------------------------------------------------------------------------------------------------------------------------------------------------------------------------------------|---------|
| 5111 | pcnA     | proliferating cell nuclear antigen                                                                                                                                                                   | 0.0965  |
| 5241 | PGR      | progesterone receptor                                                                                                                                                                                | -0.202  |
| 5300 | PIN1     | peptidylprolyl cis/trans isomerase, NIMA-interacting 1 polymerase (DNA directed), delta 2, regulatory subunit                                                                                        | 0.0291  |
| 5425 | Pold2    | 50kDa                                                                                                                                                                                                | 0.0473  |
| 5585 | PKN1     | protein kinase N1                                                                                                                                                                                    | 0.0364  |
| 5594 | MAPK1    | mitogen-activated protein kinase 1                                                                                                                                                                   | 0.0411  |
| 5829 | PXN      | paxillin                                                                                                                                                                                             | 0.0334  |
| 5888 | rad51    | RAD51 homolog (RecA homolog, E. coli) ( <i>S. cerevisiae</i> )                                                                                                                                       | 0.0945  |
| 6128 | RPL6P27  | ribosomal protein L6 pseudogene 27; ribosomal protein L6 pseudogene 19; ribosomal protein L6; ribosomal protein L6 pseudogene 10                                                                     | -0.0759 |
| 6159 | RPL29P12 | ribosomal protein L29 pseudogene 9; ribosomal protein L29 pseudogene 12; ribosomal protein L29 pseudogene 11; ribosomal protein L29; ribosomal protein L29 pseudogene 26                             | -0.074  |
| 6256 | RXRA     | retinoid X receptor, alpha                                                                                                                                                                           | 0.0535  |
| 6696 | SPP1     | secreted phosphoprotein 1                                                                                                                                                                            | 0.1638  |
| 6776 | STAT5A   | signal transducer and activator of transcription 5A                                                                                                                                                  | -0.0764 |
| 6790 | AURKA    | aurora kinase A; aurora kinase A pseudogene 1                                                                                                                                                        | 0.1746  |
| 7083 | tk1      | thymidine kinase 1, soluble                                                                                                                                                                          | 0.2329  |
| 7157 | tp53     | tumor protein p53                                                                                                                                                                                    | -0.0092 |
| 7186 | traF2    | TNF receptor-associated factor 2                                                                                                                                                                     | 0.0483  |
| 7283 | TUBG1    | tubulin, gamma 1; similar to Tubulin, gamma 1                                                                                                                                                        | 0.047   |
| 7327 | UBE2G2   | ubiquitin-conjugating enzyme E2G 2 (UBC7 homolog, yeast)                                                                                                                                             | 0.0289  |
| 7337 | Ube3a    | ubiquitin protein ligase E3A                                                                                                                                                                         | -0.0377 |
| 7430 | EZR      | hypothetical protein LOC100129652; ezrin                                                                                                                                                             | 0.0596  |
| 7529 | YWHAB    | tyrosine 3-monooxygenase/tryptophan 5-monooxygenase activation protein, beta polypeptide                                                                                                             | 0.0257  |
| 7531 | YWHAE    | similar to 14-3-3 protein epsilon (14-3-3E) (Mitochondrial import stimulation factor L subunit) (MSF L); tyrosine 3-monooxygenase/tryptophan 5-monooxygenase activation protein, epsilon polypeptide | -0.0159 |
| 7534 | YWHAZ    | tyrosine 3-monooxygenase/tryptophan 5-monooxygenase activation protein, zeta polypeptide                                                                                                             | 0.1085  |
| 7704 | ZBTB16   | zinc finger and BTB domain containing 16                                                                                                                                                             | -0.161  |
| 7706 | TRIM25   | tripartite motif-containing 25                                                                                                                                                                       | 0.0557  |
| 8318 | Cdc45    | CDC45 cell division cycle 45-like ( <i>S. cerevisiae</i> )                                                                                                                                           | 0.1407  |
| 8648 | NCOA1    | nuclear receptor coactivator 1                                                                                                                                                                       | -0.0309 |
| 9024 | BRSK2    | BR serine/threonine kinase 2                                                                                                                                                                         | 0.0259  |
| 9088 | PKMYT1   | protein kinase, membrane associated tyrosine/threonine 1                                                                                                                                             | 0.189   |

|        |          |                                                                              |         |
|--------|----------|------------------------------------------------------------------------------|---------|
| 9133   | CCNB2    | cyclin B2                                                                    | 0.2096  |
| 9212   | AURKB    | aurora kinase B                                                              | 0.144   |
| 9368   | SLC9A3R1 | solute carrier family 9 (sodium/hydrogen exchanger),<br>member 3 regulator 1 | 0.0883  |
| 9513   | FXR2     | fragile X mental retardation, autosomal homolog 2                            | -0.001  |
| 9612   | ncor2    | nuclear receptor co-repressor 2                                              | 0.0565  |
| 10376  | TUBA1B   | hypothetical gene supported by AF081484; NM_006082;<br>tubulin, alpha 1b     | 0.0673  |
| 10521  | DDX17    | DEAD (Asp-Glu-Ala-Asp) box polypeptide 17                                    | -0.0832 |
| 10563  | CXCL13   | chemokine (C-X-C motif) ligand 13                                            | -0.1864 |
| 10733  | PLK4     | polo-like kinase 4 (Drosophila)                                              | 0.0601  |
| 11188  | nisch    | nischarin                                                                    | -0.052  |
| 23594  | ORC6L    | origin recognition complex, subunit 6 like (yeast)                           | 0.1505  |
| 51053  | gmn      | geminin, DNA replication inhibitor                                           | 0.046   |
| 140890 | SFRS12   | splicing factor, arginine/serine-rich 12                                     | -0.0615 |

---
