# Supplementary material for: Identifying protein interaction subnetworks by a bagging Markov random field-based method
Source: PubMed Central journal article supplement — Nucleic Acids Res. 2012 Nov 17;41(2):e42. doi: 10.1093/nar/gks951 (PMC3553975; doi:10.1093/nar/gks951), 2012-11-17
Supplement: supp_gks951_nar-01217-met-n-2012-File016.pdf [file supp_gks951_nar-01217-met-n-2012-File016.pdf]

| Entrez Gene |        |                                                                                                                    | Fold Change<br>(log <sub>2</sub> (Recurrence/No<br>nRecurrence)) |
|-------------|--------|--------------------------------------------------------------------------------------------------------------------|------------------------------------------------------------------|
| ID          | Symbol | Gene Name                                                                                                          |                                                                  |
| 25          | ABL1   | c-abl oncogene 1, receptor tyrosine kinase                                                                         | -0.1339                                                          |
| 86          | actl6a | actin-like 6A                                                                                                      | 0.3254                                                           |
| 163         | AP2B1  | adaptor-related protein complex 2, beta 1 subunit                                                                  | -0.2694                                                          |
| 355         | Fas    | Fas (TNF receptor superfamily, member 6)                                                                           | -0.1884                                                          |
| 367         | Ar     | androgen receptor                                                                                                  | -0.3413                                                          |
| 382         | Arf6   | ADP-ribosylation factor 6                                                                                          | -0.2559                                                          |
| 409         | arrb2  | arrestin, beta 2                                                                                                   | -0.3419                                                          |
| 472         | ATM    | similar to Serine-protein kinase ATM (Ataxia telangiectasia mutated) (A-T, mutated); ataxia telangiectasia mutated | -0.2928                                                          |
| 563         | AZGP1  | alpha-2-glycoprotein 1, zinc-binding                                                                               | -0.4975                                                          |
| 573         | bag1   | BCL2-associated athanogene                                                                                         | -0.2589                                                          |
| 596         | BCL2   | B-cell CLL/lymphoma 2                                                                                              | -0.3702                                                          |
| 650         | bmp2   | bone morphogenetic protein 2                                                                                       | -0.2242                                                          |
| 701         | BUB1B  | budding uninhibited by benzimidazoles 1 homolog beta (yeast)                                                       | 0.2967                                                           |
| 890         | CCNA2  | cyclin A2                                                                                                          | 0.2897                                                           |
| 898         | CCNE1  | cyclin E1                                                                                                          | 0.1848                                                           |
| 960         | CD44   | CD44 molecule (Indian blood group)                                                                                 | -0.5287                                                          |
| 983         | Cdk1   | cell division cycle 2, G1 to S and G2 to M                                                                         | 0.4641                                                           |
| 991         | cdc20  | cell division cycle 20 homolog (S. cerevisiae)                                                                     | 0.4375                                                           |
| 993         | CDC25A | cell division cycle 25 homolog A (S. pombe)                                                                        | 0.3421                                                           |
| 1017        | Cdk2   | cyclin-dependent kinase 2                                                                                          | -0.2314                                                          |
| 1147        | CHUK   | conserved helix-loop-helix ubiquitous kinase                                                                       | 0.1304                                                           |
| 1234        | CCR5   | chemokine (C-C motif) receptor 5                                                                                   | -0.296                                                           |
| 1398        | crk    | v-crk sarcoma virus CT10 oncogene homolog (avian)                                                                  | -0.2908                                                          |
| 1438        | CSF2RA | colony stimulating factor 2 receptor, alpha, low-affinity (granulocyte-macrophage)                                 | -0.4079                                                          |
| 1612        | DAPK1  | death-associated protein kinase 1                                                                                  | -0.1173                                                          |
| 1616        | DAXX   | death-domain associated protein                                                                                    | -0.155                                                           |
| 1869        | E2F1   | E2F transcription factor 1                                                                                         | 0.3934                                                           |
| 1894        | ECT2   | epithelial cell transforming sequence 2 oncogene                                                                   | 0.3182                                                           |
| 2051        | EPHB6  | EPH receptor B6                                                                                                    | -0.1631                                                          |
| 2185        | PTK2B  | PTK2B protein tyrosine kinase 2 beta                                                                               | -0.2209                                                          |
| 2534        | FYN    | FYN oncogene related to SRC, FGR, YES                                                                              | -0.3295                                                          |
| 2959        | Gtf2b  | general transcription factor IIB                                                                                   | -0.1                                                             |
| 3055        | HCK    | hemopoietic cell kinase                                                                                            | -0.2044                                                          |
| 3066        | HDAC2  | histone deacetylase 2                                                                                              | 0.1361                                                           |
| 3091        | HIF1A  | hypoxia inducible factor 1, alpha subunit (basic helix-loop-helix transcription factor)                            | 0.1962                                                           |
| 3297        | hsf1   | heat shock transcription factor 1                                                                                  | 0.2088                                                           |
| 3635        | Inpp5d | inositol polyphosphate-5-phosphatase, 145kDa                                                                       | -0.2241                                                          |
| 3678        | ITGA5  | integrin, alpha 5 (fibronectin receptor, alpha polypeptide)                                                        | 0.1623                                                           |
| 3685        | Itgav  | integrin, alpha V (vitronectin receptor, alpha polypeptide, antigen CD51)                                          | 0.1823                                                           |

|      |        |                                                                                                                                          |         |
|------|--------|------------------------------------------------------------------------------------------------------------------------------------------|---------|
| 3716 | JAK1   | Janus kinase 1                                                                                                                           | -0.1392 |
| 3838 | KPNA2  | karyopherin alpha 2 (RAG cohort 1, importin alpha 1);                                                                                    | 0.4365  |
| 3897 | L1cam  | L1 cell adhesion molecule                                                                                                                | 0.1761  |
| 4067 | LYN    | v-yes-1 Yamaguchi sarcoma viral related oncogene homolog                                                                                 | -0.1403 |
| 4088 | SMAD3  | SMAD family member 3                                                                                                                     | -0.2886 |
| 4194 | MDM4   | Mdm4 p53 binding protein homolog (mouse)                                                                                                 | -0.193  |
| 4605 | MYBL2  | v-myb myeloblastosis viral oncogene homolog (avian)-like 2                                                                               | 0.4402  |
| 4609 | MYC    | v-myc myelocytomatosis viral oncogene homolog (avian)                                                                                    | -0.3314 |
| 4739 | Nedd9  | neural precursor cell expressed, developmentally down-regulated 9                                                                        | -0.2264 |
| 4790 | NFKB1  | nuclear factor of kappa light polypeptide gene enhancer in B-cells 1                                                                     | -0.1838 |
| 5175 | PECAM1 | platelet/endothelial cell adhesion molecule                                                                                              | -0.5014 |
| 5241 | PGR    | progesterone receptor                                                                                                                    | -0.7649 |
| 5295 | Pik3r1 | phosphoinositide-3-kinase, regulatory subunit 1 (alpha)                                                                                  | -0.2912 |
| 5347 | PLK1   | polo-like kinase 1 (Drosophila)                                                                                                          | 0.1809  |
| 5371 | PML    | promyelocytic leukemia; similar to promyelocytic leukemia protein isoform 1                                                              | -0.352  |
| 5579 | PRKCB  | protein kinase C, beta                                                                                                                   | -0.359  |
| 5685 | PsmA4  | proteasome (prosome, macropain) subunit, alpha type, 4                                                                                   | 0.1266  |
| 5687 | PsmA6  | proteasome (prosome, macropain) subunit, alpha type, 6                                                                                   | 0.2025  |
| 5688 | PSMA7  | proteasome (prosome, macropain) subunit, alpha type, 7                                                                                   | 0.293   |
| 5692 | PSMB4  | proteasome (prosome, macropain) subunit, beta type, 4                                                                                    | 0.1766  |
| 5693 | PSMB5  | proteasome (prosome, macropain) subunit, beta type, 5                                                                                    | 0.167   |
| 5696 | psmb8  | proteasome (prosome, macropain) subunit, beta type, 8 (large multifunctional peptidase 7)                                                | -0.3727 |
| 5706 | Psmc6  | proteasome (prosome, macropain) 26S subunit, ATPase, 6                                                                                   | 0.2096  |
| 5757 | PTMA   | hypothetical LOC728026; prothymosin, alpha; hypothetical gene supported by BC013859; prothymosin, alpha pseudogene 4 (gene sequence 112) | -0.1188 |
| 5788 | Ptpcr  | protein tyrosine phosphatase, receptor type, C                                                                                           | -0.3857 |
| 5883 | RAD9A  | RAD9 homolog A (S. pombe)                                                                                                                | 0.1209  |
| 5888 | rad51  | RAD51 homolog (RecA homolog, E. coli) (S. cerevisiae)                                                                                    | 0.3104  |
| 5925 | RB1    | retinoblastoma 1                                                                                                                         | -0.273  |
| 5933 | Rbl1   | retinoblastoma-like 1 (p107)                                                                                                             | 0.2391  |
| 5971 | relB   | v-rel reticuloendotheliosis viral oncogene homolog B                                                                                     | -0.1927 |
| 6387 | CXCL12 | chemokine (C-X-C motif) ligand 12 (stromal cell-derived factor 1)                                                                        | -0.4029 |

|       |          |                                                            |         |
|-------|----------|------------------------------------------------------------|---------|
|       |          | SWI/SNF related, matrix associated, actin dependent        |         |
| 6597  | SMARCA4  | regulator of chromatin, subfamily a, member 4              | -0.26   |
| 6696  | SPP1     | secreted phosphoprotein 1                                  | 0.3588  |
|       |          | signal transducer and activator of transcription 3 (acute- |         |
| 6774  | Stat3    | phase response factor)                                     | -0.3578 |
| 6776  | STAT5A   | signal transducer and activator of transcription 5A        | -0.2179 |
| 6790  | AURKA    | aurora kinase A; aurora kinase A pseudogene 1              | 0.6516  |
|       |          | similar to G/T mismatch-specific thymine DNA glycosylase;  |         |
| 6996  | TDG      | thymine-DNA glycosylase                                    | 0.2732  |
| 7046  | tgfbr1   | transforming growth factor, beta receptor 1                | -0.2501 |
|       |          |                                                            |         |
| 7048  | Tgfbr2   | transforming growth factor, beta receptor II (70/80kDa)    | -0.2531 |
| 7049  | Tgfbr3   | transforming growth factor, beta receptor III              | -0.4264 |
| 7150  | TOP1     | topoisomerase (DNA) I                                      | -0.2468 |
| 7161  | TP73     | tumor protein p73                                          | -0.1749 |
| 7185  | Traf1    | TNF receptor-associated factor 1                           | -0.1401 |
| 7186  | traF2    | TNF receptor-associated factor 2                           | -0.1801 |
|       |          |                                                            |         |
| 7329  | UBE2I    | ubiquitin-conjugating enzyme E2I (UBC9 homolog, yeast)     | -0.2831 |
| 7421  | VDR      | vitamin D (1,25- dihydroxyvitamin D3) receptor             | 0.2349  |
| 7514  | xpo1     | exportin 1 (CRM1 homolog, yeast)                           | 0.1244  |
| 7704  | ZBTB16   | zinc finger and BTB domain containing 16                   | -0.3164 |
| 7818  | DAP3     | death associated protein 3                                 | 0.1503  |
| 7852  | CXCR4    | chemokine (C-X-C motif) receptor 4                         | -0.3623 |
| 8438  | RAD54L   | RAD54-like ( <i>S. cerevisiae</i> )                        | 0.4381  |
| 8648  | NCOA1    | nuclear receptor coactivator 1                             | -0.1575 |
| 8651  | Socs1    | suppressor of cytokine signaling 1                         | -0.2016 |
| 8682  | PEA15    | phosphoprotein enriched in astrocytes 15                   | -0.1747 |
| 8683  | SFRS9    | splicing factor, arginine/serine-rich 9                    | -0.0213 |
| 8754  | Adam9    | ADAM metallopeptidase domain 9 (meltrin gamma)             | 0.268   |
| 8772  | Fadd     | Fas (TNFRSF6)-associated via death domain                  | 0.2636  |
| 8805  | TRIM24   | tripartite motif-containing 24                             | 0.2218  |
| 8841  | HDAC3    | histone deacetylase 3                                      | -0.109  |
| 8930  | MBD4     | methyl-CpG binding domain protein 4                        | -0.0449 |
| 9021  | socs3    | suppressor of cytokine signaling 3                         | -0.388  |
| 9055  | prc1     | protein regulator of cytokinesis 1                         | 0.4571  |
| 9133  | CCNB2    | cyclin B2                                                  | 0.4649  |
| 9459  | ARHGEF6  | Rac/Cdc42 guanine nucleotide exchange factor (GEF) 6       | -0.4018 |
| 9493  | KIF23    | kinesin family member 23                                   | 0.311   |
|       |          | similar to RNA binding motif protein 39; RNA binding motif |         |
| 9584  | Rbm39    | protein 39                                                 | 0.1182  |
| 10062 | NR1H3    | nuclear receptor subfamily 1, group H, member 3            | -0.2473 |
| 10521 | DDX17    | DEAD (Asp-Glu-Ala-Asp) box polypeptide 17                  | -0.6255 |
| 10635 | RAD51AP1 | RAD51 associated protein 1                                 | 0.3826  |
|       |          | tyrosine 3-monooxygenase/tryptophan 5-monooxygenase        |         |
| 10971 | ywhaQ    | activation protein, theta polypeptide                      | 0.2157  |
|       |          | COP9 constitutive photomorphogenic homolog subunit 5       |         |
| 10987 | Cops5    | ( <i>Arabidopsis</i> )                                     | 0.1645  |
| 11340 | EXOSC8   | exosome component 8                                        | 0.0791  |
| 23054 | NCOA6    | nuclear receptor coactivator 6                             | 0.0815  |

|        |          |                                                                                        |         |
|--------|----------|----------------------------------------------------------------------------------------|---------|
| 23658  | LSM5     | LSM5 homolog, U6 small nuclear RNA associated (S. cerevisiae)                          | 0.2126  |
| 25788  | rad54b   | RAD54 homolog B (S. cerevisiae)                                                        | 0.3525  |
| 25843  | MOBK13   | MOB1, Mps One Binder kinase activator-like 3 (yeast)                                   | 0.1529  |
| 26135  | serbp1   | SERPINE1 mRNA binding protein 1                                                        | 0.2277  |
| 27257  | LSM1     | LSM1 homolog, U6 small nuclear RNA associated (S. cerevisiae)                          | 0.2139  |
| 27258  | LSM3     | LSM3 homolog, U6 small nuclear RNA associated (S. cerevisiae); similar to Lsm3 protein | 0.104   |
| 55165  | CEP55    | centrosomal protein 55kDa                                                              | 0.4394  |
| 55257  | c20orf20 | chromosome 20 open reading frame 20                                                    | 0.2009  |
| 55367  | Lrdd     | leucine-rich repeats and death domain containing                                       | 0.3116  |
| 55662  | Hif1an   | hypoxia inducible factor 1, alpha subunit inhibitor                                    | -0.2395 |
| 55872  | PBK      | PDZ binding kinase                                                                     | 0.4709  |
| 57062  | DDX24    | DEAD (Asp-Glu-Ala-Asp) box polypeptide 24                                              | -0.3061 |
| 57819  | LSM2     | LSM2 homolog, U6 small nuclear RNA associated (S. cerevisiae)                          | -0.1151 |
| 64689  | Gorasp1  | golgi reassembly stacking protein 1, 65kDa                                             | 0.0123  |
| 64750  | SMURF2   | SMAD specific E3 ubiquitin protein ligase 2                                            | 0.1966  |
| 259266 | ASPM     | asp (abnormal spindle) homolog, microcephaly associated (Drosophila)                   | 0.5247  |

---
